# Supplementary material
Source: PubMed Central journal article supplement (PMC7052789)
Supplement: jamapediatr-174-e196294-s001.pdf [file jamapediatr-174-e196294-s001.pdf]

## Supplementary Online Content

Rysavy MA, Horbar JD, Bell EF, et al. Assessment of an updated Neonatal Research Network extremely preterm birth outcome model in the Vermont Oxford Network. *JAMA Pediatr*. Published online March 2, 2020. doi:10.1001/jamapediatrics.2019.6294

**eFigure 1.** Updated Probabilities of Survival for Infants in the NRN and VON 2006-2012 Cohorts, by Gestational Age at Birth

**eFigure 2.** Model Calibration Plots

**eFigure 3.** Decision Curve Analyses

**eFigure 4.** Differences in Observed and Expected Outcomes in 2006-2012 by Hospital, Without Accounting for Hospital Differences

**eFigure 5.** Differences in Observed and Expected Outcomes in 2013-2016 by Hospital, Using Hospital-Specific Intercepts Derived 2006-2012

**eTable 1.** Resources Utilized per Surviving Infant by Probability of Survival

**eTable 2.** Neurodevelopmental Outcomes Among Infants at Follow-up by Probability of Survival

**eTable 3.** Observed and Predicted Rates of Survival for Actively Treated and All Infants

**eAppendix.** List of Participating Hospitals in the Vermont Oxford Network

This supplementary material has been provided by the authors to give readers additional information about their work.

**eFigure 1. Estimated survival probabilities in the NRN and VON 2006-2012 cohorts, by gestational age at birth**

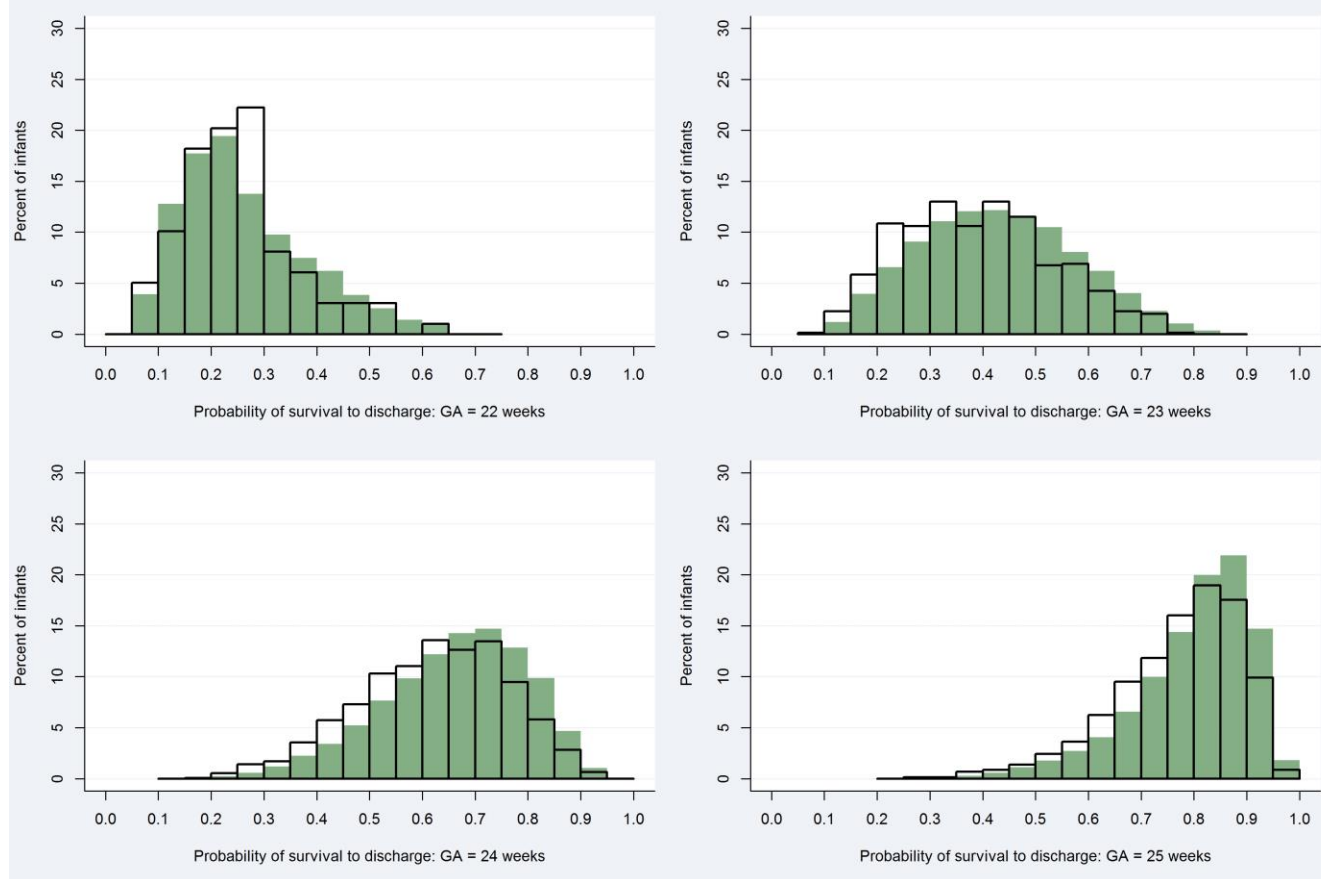

Histograms represent the percentages of infants at each gestational age with a given estimated probability of survival. White bars represent the NRN cohort. Green bars represent the VON cohort. GA=gestational age

## eFigure 2. Model calibration plots

### VON 2006-2012:

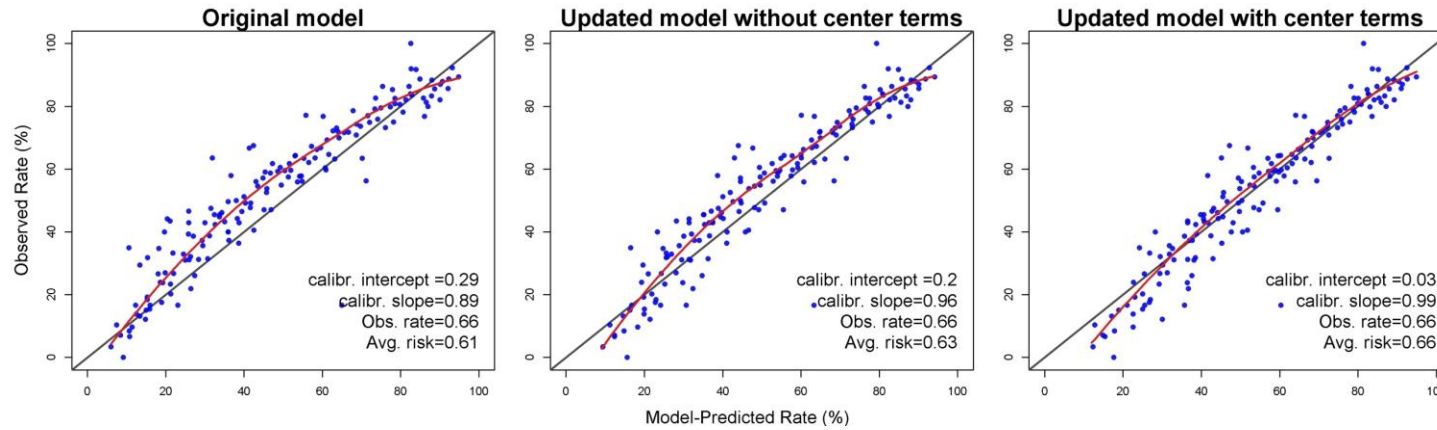

### VON 2013-2016:

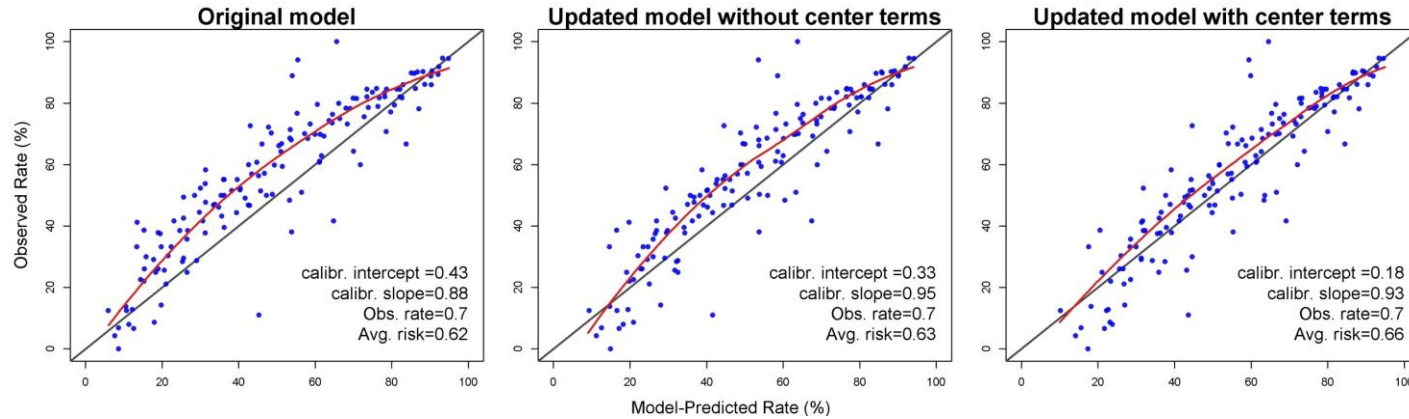

Calibration plots are based on the 160 covariate combinations with at least 5 infants in each. Combinations were based on gestational age week, birthweight (increments of 100 g), infant sex, plurality, and antenatal corticosteroids.

### eFigure 3. Decision curve analyses

VON 2006-2012:

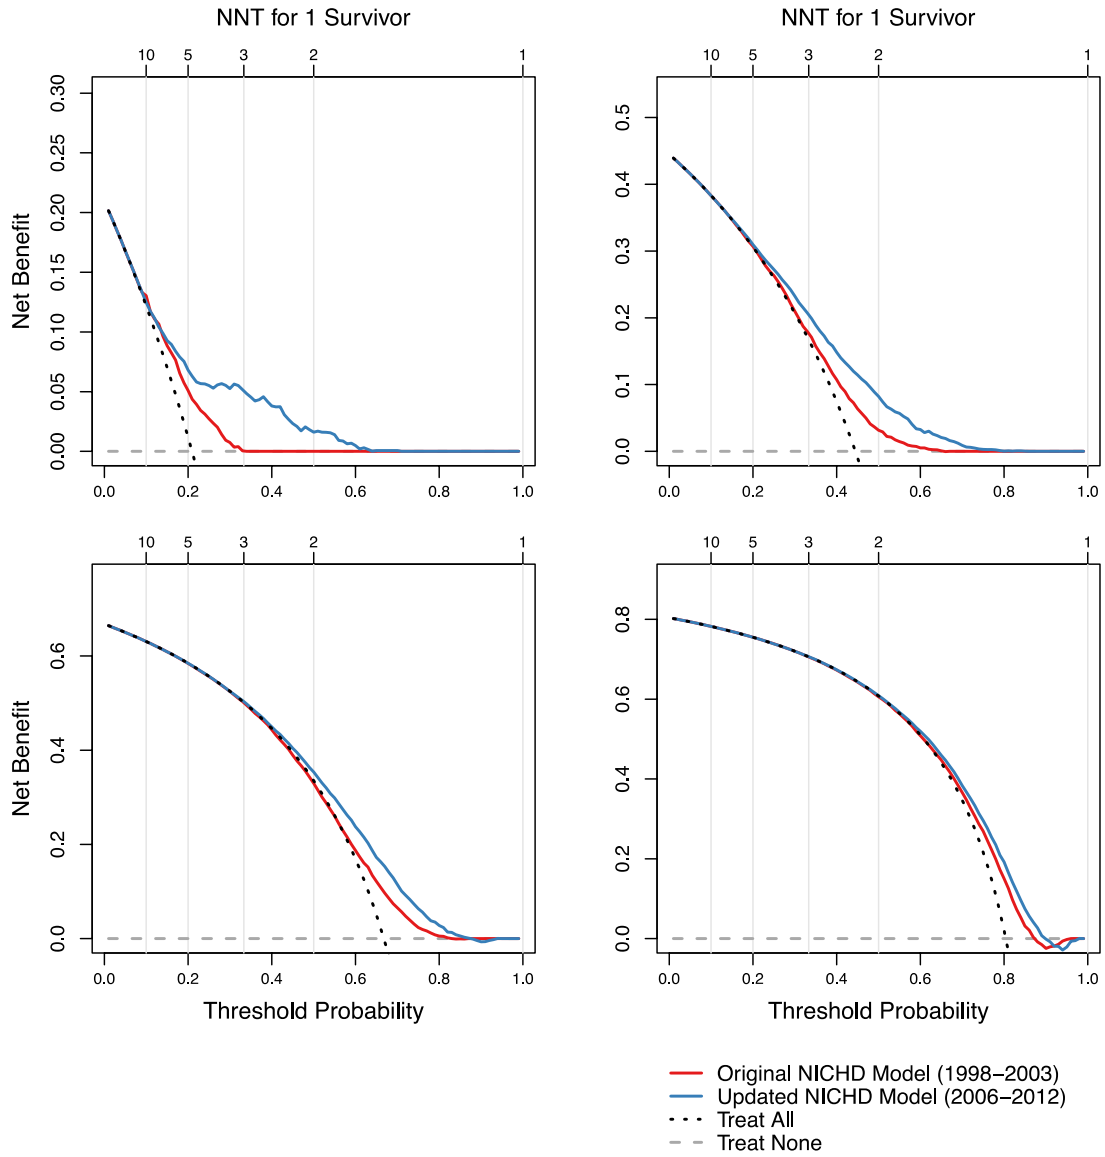

**VON 2013-2016:**

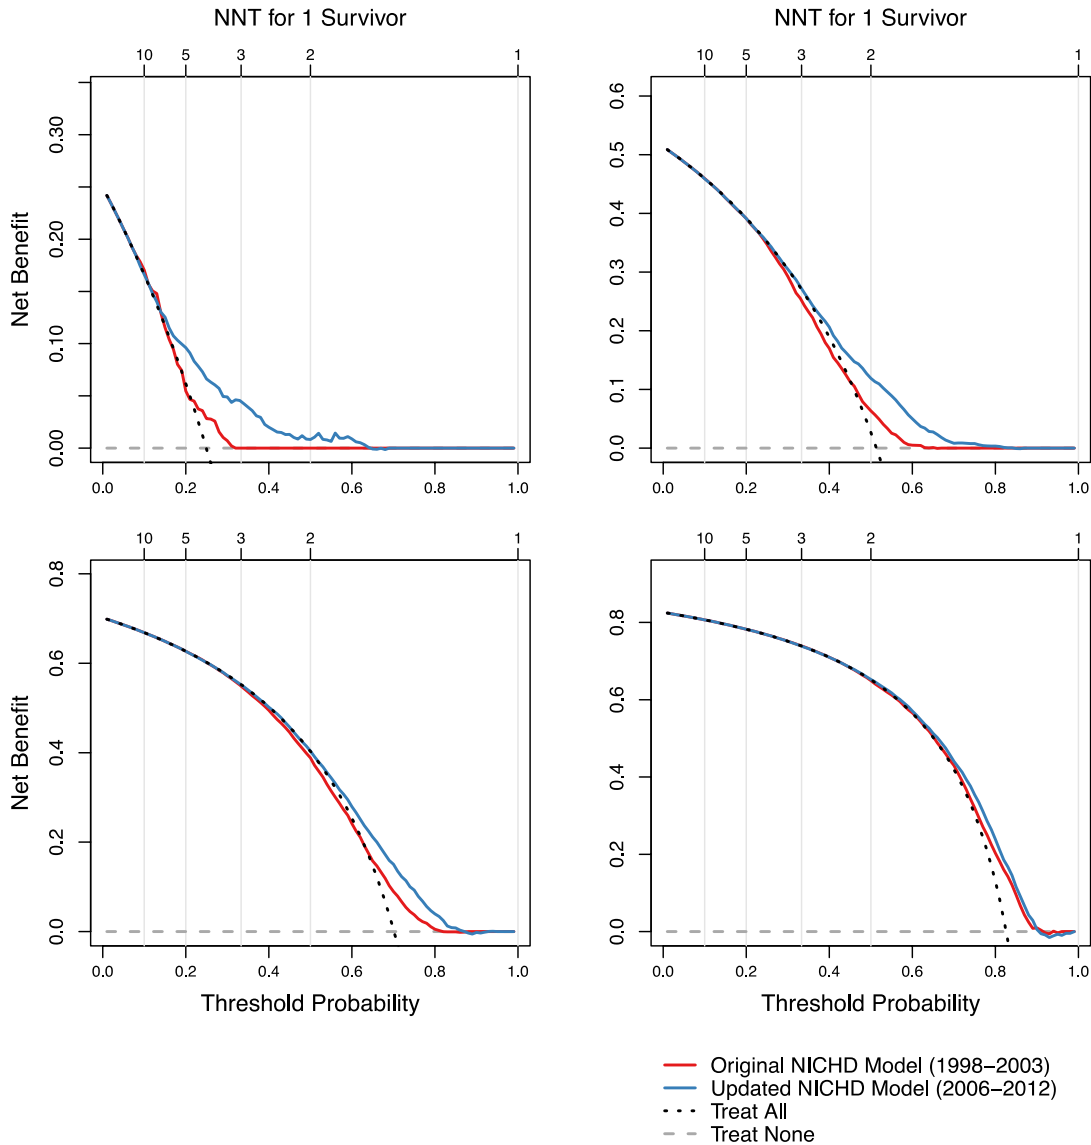

Threshold probability refers to the estimated probability of survival at and above which treatment would be offered. Predictive net benefit refers to the relative gain in the number of survivors compared to the number of treated infants not surviving when infants with an estimated probability of survival at or above the threshold probability are treated. Predictive net benefit was calculated as the difference in the proportion of treated infants who survive (“true positives”) and treated infants who do not survive (“false positives”) weighted by the value placed on the acceptable number of treated infants who survive (in this model, considered a benefit) relative to those treated who do not survive (in this model, considered a harm). Mathematically, this was represented as:  $[\text{proportion of treated infants surviving}] - [(\text{proportion of treated infants not surviving}) \times (\text{threshold probability}) / (1 - \text{threshold probability})]$ . For example, a threshold probability of 20% (i.e., where infants with predicted probabilities of survival  $\geq 20\%$ , or 1/5, would be treated), represents that, for treating one infant who survives, it would be acceptable to treat up to 4 infants who do not survive (1 - threshold probability = 80%). Because the acceptable number of treated infants who survive relative to those treated who do not survive varies among individuals, the full range of potential threshold probabilities is presented.

The decision curve analysis provides information on model performance (accounting for “true positives” and “false positives”) at a range of potential threshold probabilities. The highest curve at any threshold probability reflects that the method is the superior decision-making strategy relative to comparators in terms of balancing benefit (treating surviving infants) and harm (treating infants who do not survive) as described by the model.

NNT=number needed to treat

**eFigure 4. Differences in observed and expected outcomes in 2006-2012 by hospital, without accounting for hospital differences**

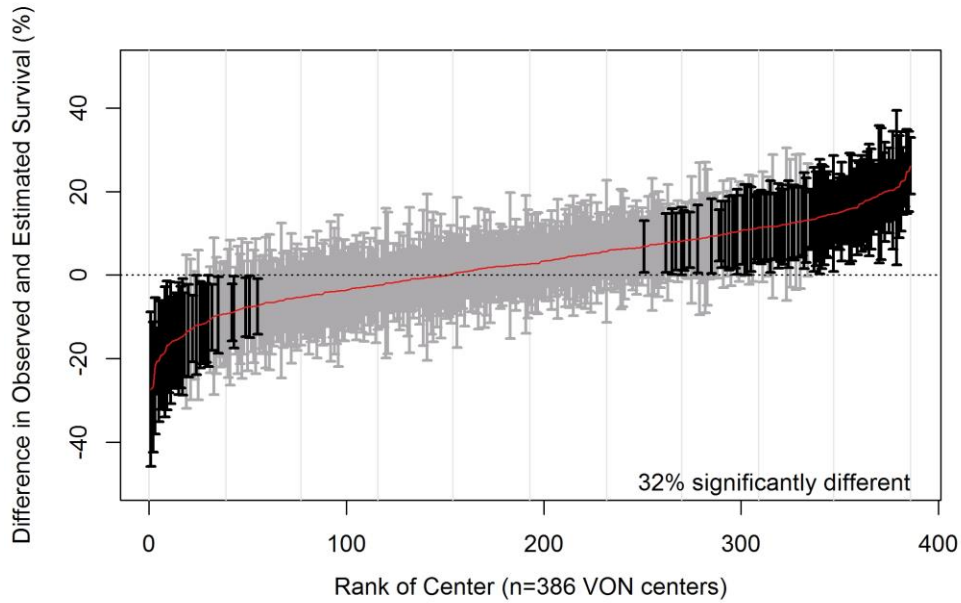

A total of 386 VON hospitals (of 637 hospitals contributing data to the study) contributed >20 infants the study period and were included in this analysis. These hospitals represent 88% of infants in the study validation cohort.

Hospitals are shown along the x-axis in rank order from least to greatest observed minus model-estimated (O-E) survival. The red line represents the point estimate of the O-E survival rate for each hospital. Hospitals with 95% confidence intervals shown in grey showed no significant difference in observed and model-estimated outcomes; hospitals with 95% confidence intervals in black do not overlap zero difference.

**eFigure 5. Differences in observed and expected outcomes in 2013-2016 by hospital, using hospital-specific intercepts derived 2006-2012**

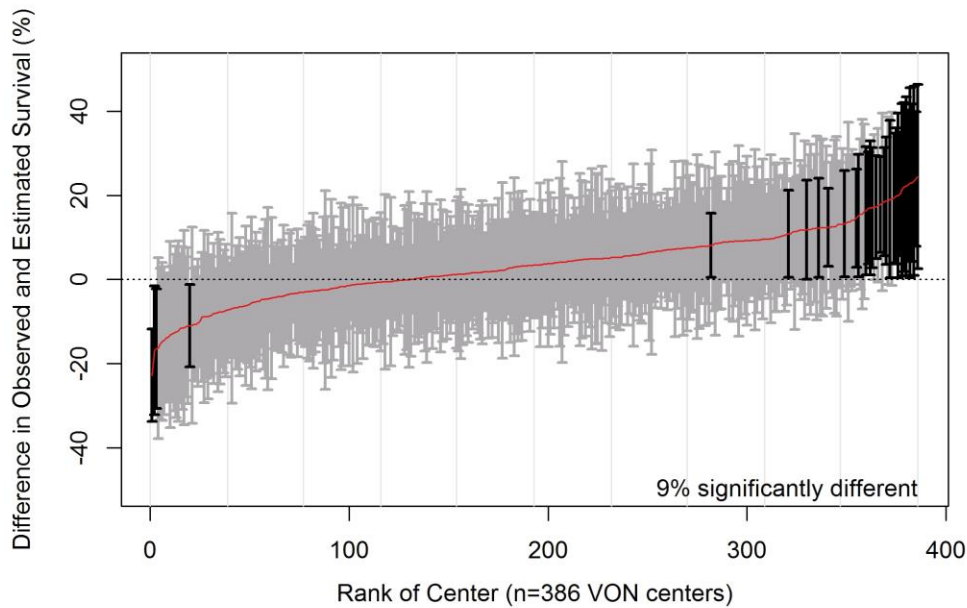

Hospital-specific model intercepts were derived from 2006-2012 data and applied to the 2013-2016 cohort to assess model stability of these hospital-specific terms. The same 386 hospitals are included in both time periods.

Hospitals are shown along the x-axis in rank order from least to greatest observed minus model-estimated (O-E) survival. The red line represents the point estimate of the O-E survival rate for each hospital. Hospitals with 95% confidence intervals shown in grey showed no significant difference in observed and model-estimated outcomes; hospitals with 95% confidence intervals in black do not overlap zero difference.

**eTable 1. Resources utilized per surviving infant by probability of survival**

| Probability of survival | Actively treated infants (n) | Died on day of birth (n, %) | Age at death (d)—median, 25th-75 <sup>th</sup> percentile | Survived (n, %) | Infant-days of mechanical ventilation per surviving infant (d) | Infant-days of hospitalization per surviving infant (d) |
|-------------------------|------------------------------|-----------------------------|-----------------------------------------------------------|-----------------|----------------------------------------------------------------|---------------------------------------------------------|
| ≤5%                     | 0                            | N/A                         | N/A                                                       | 0               | N/A                                                            | N/A                                                     |
| 6-10%                   | 6                            | 3 (50%)                     | 6 (3-18)                                                  | 0 (0%)          | N/A                                                            | N/A                                                     |
| 11-20%                  | 90                           | 39 (43%)                    | 10 (3-24)                                                 | 9 (10%)         | 153                                                            | 280                                                     |
| 21-40%                  | 523                          | 122 (23%)                   | 11 (4-23)                                                 | 155 (30%)       | 90                                                             | 191                                                     |
| 41-60%                  | 976                          | 122 (13%)                   | 11 (4-24)                                                 | 478 (49%)       | 62                                                             | 160                                                     |
| 61-80%                  | 1599                         | 72 (5%)                     | 17 (6-44)                                                 | 1173 (73%)      | 44                                                             | 137                                                     |
| >80%                    | 979                          | 28 (3%)                     | 18 (9-36)                                                 | 826 (84%)       | 28                                                             | 115                                                     |

Data derived from the NICHD Neonatal Research Network 2006-2012. Age at death (in days) derived for infants who did not die on the day of birth. Infant-days of mechanical ventilation per surviving infant were calculated as the total number of ventilator days for all actively treated infants with a given range of survival probabilities divided by the number of surviving infants. Infant-days of hospitalization per surviving infant were calculated analogously.



**eTable 2. Neurodevelopmental outcomes among infants at follow-up by probability of survival**

| Probability of survival | Profound neurodevelopmental impairment | Moderate-severe neurodevelopmental impairment <sup>a</sup> | Blindness | Deafness | Moderate-severe cerebral palsy | BSID-III cognitive score >1 SD below mean |
|-------------------------|----------------------------------------|------------------------------------------------------------|-----------|----------|--------------------------------|-------------------------------------------|
| <10%                    | —                                      | —                                                          | —         | —        | —                              | —                                         |
| 11-20%                  | 11%                                    | 78%                                                        | 0         | 11%      | 22%                            | 67%                                       |
| 21-40%                  | 6%                                     | 52%                                                        | <1%       | 5%       | 15%                            | 46%                                       |
| 41-60%                  | 5%                                     | 37%                                                        | <1%       | 2%       | 9%                             | 35%                                       |
| 61-80%                  | 3%                                     | 32%                                                        | <1%       | 1%       | 6%                             | 31%                                       |
| >80%                    | 1%                                     | 21%                                                        | <1%       | 1%       | 4%                             | 19%                                       |

Neurodevelopmental assessment at 18-22 (for infants born April 2006 – June 2012) and 22-26 (from July 2012 – December 2012) months' corrected age was performed by standardized, annually certified examiners. Profound neurodevelopmental impairment (NDI) was defined as cognitive score on the Bayley Scales of Infant and Toddler Development, third edition, (BSID-III) that was untestable or a Gross Motor Function Classification System (GMFCS) level of 5 (on a scale of 0 [normal] to 5 [most impaired]). A level of 0 represents no noted deficits whereas a level of 5 represents limited muscle function including an inability to lift the head against gravity. Moderate-severe NDI was defined as a BSID-III cognitive score of less than 85 (i.e., >1 standard deviation [SD] below the scale mean; mean [ $\pm$ SD] of 100 $\pm$ 15), moderate or severe cerebral palsy, a Gross Motor Function Classification System (GMFCS) level of 2-5, bilateral blindness, or severe hearing impairment that could not be corrected with bilateral amplification. The composite outcomes deviate from those used by the original five-factor model due to the change in instrument from the second to the third edition of the Bayley Scales of Infant and Toddler Development, which occurred for births in the NICHD Neonatal Research Network cohort after January 1, 2006. Therefore, outcomes cannot be directly compared to those used in the original five-factor model. There were 6 infants with estimated survival <10% who were actively treated; of these, none survived to follow-up.

<sup>a</sup> Includes profound neurodevelopmental impairment

**eTable 3. Observed and predicted rates of survival for actively treated and all infants**

|                             | <b>Gestational Age</b> | <b>Total infants</b> | <b>Actively treated infants (%)</b> | <b>Observed survival rate among treated (%)</b> | <b>Predicted survival rate among treated (%)</b> | <b>Observed survival rate among all infants (%)</b> | <b>Maximum potential survival rate among all infants (%)</b> |
|-----------------------------|------------------------|----------------------|-------------------------------------|-------------------------------------------------|--------------------------------------------------|-----------------------------------------------------|--------------------------------------------------------------|
| <i>VON cohort 2006-2012</i> |                        |                      |                                     |                                                 |                                                  |                                                     |                                                              |
|                             | 22                     | 5156                 | 1432 (28%)                          | 21%                                             | 26%                                              | 6%                                                  | 22%                                                          |
|                             | 23                     | 11009                | 9026 (82%)                          | 45%                                             | 43%                                              | 37%                                                 | 41%                                                          |
|                             | 24                     | 16712                | 16383 (98%)                         | 67%                                             | 66%                                              | 66%                                                 | 66%                                                          |
|                             | 25                     | 18428                | 18338 (99%)                         | 80%                                             | 80%                                              | 80%                                                 | 80%                                                          |
|                             | All                    | 51305                | 45179 (88%)                         | 66%                                             | 66%                                              | 58%                                                 | 61%                                                          |
| <i>VON cohort 2013-2016</i> |                        |                      |                                     |                                                 |                                                  |                                                     |                                                              |
|                             | 22                     | 2611                 | 850 (33%)                           | 25%                                             | 29%                                              | 8%                                                  | 23%                                                          |
|                             | 23                     | 6285                 | 5521 (88%)                          | 51%                                             | 45%                                              | 45%                                                 | 44%                                                          |
|                             | 24                     | 9355                 | 9233 (99%)                          | 70%                                             | 67%                                              | 69%                                                 | 67%                                                          |
|                             | 25                     | 10388                | 10365 (100%)                        | 83%                                             | 81%                                              | 82%                                                 | 81%                                                          |
|                             | All                    | 28639                | 25969 (91%)                         | 70%                                             | 67%                                              | 63%                                                 | 63%                                                          |

Rates for all infants include for infants both actively treated and not actively treated. All infants who did not receive active treatment died. The maximum potential survival rate among all infants represents the predicted survival rate if all infants were treated. It assumes that infants not receiving potentially lifesaving interventions had the same potential for survival as infants actively treated after birth and so provides an extreme optimistic estimate of potential outcomes.

**eAppendix.** List of Participating Hospitals in the Vermont Oxford Network

| <b>Hospital</b>                                        | <b>City</b>  | <b>State</b> |
|--------------------------------------------------------|--------------|--------------|
| Brookwood Medical Center                               | Birmingham   | AL           |
| Huntsville Hospital                                    | Huntsville   | AL           |
| USA Children's and Women's Hospital                    | Mobile       | AL           |
| Baptist Medical Center East                            | Montgomery   | AL           |
| Baptist Medical Center South                           | Montgomery   | AL           |
| Children's Hospital at Providence                      | Anchorage    | AK           |
| Abrazo Arrowhead Campus                                | Glendale     | AZ           |
| Banner Thunderbird Medical Center                      | Glendale     | AZ           |
| Cardon Children's Medical Center                       | Mesa         | AZ           |
| Arizona Children's Center Maricopa Integrated Health   | Phoenix      | AZ           |
| Banner Estrella Medical Center                         | Phoenix      | AZ           |
| Phoenix Children's Hospital                            | Phoenix      | AZ           |
| St. Joseph's Hospital and Medical Center               | Phoenix      | AZ           |
| HonorHealth Scottsdale Shea Medical Center             | Scottsdale   | AZ           |
| Banner University Medical Center                       | Tucson       | AZ           |
| Mercy Hospital Fort Smith                              | Fort Smith   | AR           |
| Willow Creek Women's Hospital                          | Johnson      | AR           |
| Arkansas Children's Hospital                           | Little Rock  | AR           |
| University of Arkansas for Medical Sciences            | Little Rock  | AR           |
| Anaheim Regional Medical Center                        | Anaheim      | CA           |
| Kaiser Permanente Orange County/Anaheim                | Anaheim      | CA           |
| St. Mary Medical Center                                | Apple Valley | CA           |
| Methodist Hospital of Southern California              | Arcadia      | CA           |
| Bakersfield Memorial Hospital                          | Bakersfield  | CA           |
| Kern Medical Center                                    | Bakersfield  | CA           |
| Mercy Southwest Hospital                               | Bakersfield  | CA           |
| Kaiser Permanente Baldwin Park                         | Baldwin Park | CA           |
| Kaiser Permanente Bellflower                           | Bellflower   | CA           |
| Alta Bates Summit Medical Center                       | Berkeley     | CA           |
| Providence St. Joseph Medical Center                   | Burbank      | CA           |
| Mercy San Juan Medical Center                          | Carmichael   | CA           |
| Scripps Mercy Hospital Chula Vista                     | Chula Vista  | CA           |
| Sharp Chula Vista Medical Center                       | Chula Vista  | CA           |
| Arrowhead Regional Medical Center                      | Colton       | CA           |
| Downey Regional Medical Center                         | Downey       | CA           |
| Kaiser Permanente Downey                               | Downey       | CA           |
| El Centro Regional Medical Center                      | El Centro    | CA           |
| Rady Children's at Scripps Encinitas Memorial Hospital | Encinitas    | CA           |

| <b>Hospital</b>                                      | <b>City</b>     | <b>State</b> |
|------------------------------------------------------|-----------------|--------------|
| Rady Children's at Palomar Health Downtown Campus    | Escondido       | CA           |
| Northbay Medical Center                              | Fairfield       | CA           |
| Kaiser Permanente Fontana                            | Fontana         | CA           |
| Fountain Valley Regional Hospital and Medical Center | Fountain Valley | CA           |
| San Joaquin General Hospital                         | French Camp     | CA           |
| Community Regional Medical Center                    | Fresno          | CA           |
| St. Jude Medical Center                              | Fullerton       | CA           |
| Adventist Health                                     | Glendale        | CA           |
| Glendale Memorial Hospital and Health Center         | Glendale        | CA           |
| Kaiser Permanente South Bay                          | Harbor City     | CA           |
| Centinela Hospital Medical Center                    | Inglewood       | CA           |
| Kaiser Permanente Irvine                             | Irvine          | CA           |
| Rady Children's at Scripps La Jolla                  | La Jolla        | CA           |
| Grossmont Hospital Women's Health Center             | La Mesa         | CA           |
| Saddleback Memorial Medical Center                   | Laguna Hills    | CA           |
| Antelope Valley Hospital                             | Lancaster       | CA           |
| Loma Linda University Children's Hospital            | Loma Linda      | CA           |
| Miller Children's and Women's Hospital at Long Beach | Long Beach      | CA           |
| St. Mary Medical Center                              | Long Beach      | CA           |
| Adventist Health                                     | Los Angeles     | CA           |
| California Hospital Medical Center                   | Los Angeles     | CA           |
| Cedars-Sinai Medical Center                          | Los Angeles     | CA           |
| Good Samaritan Hospital                              | Los Angeles     | CA           |
| Hollywood Presbyterian Medical Center                | Los Angeles     | CA           |
| Kaiser Permanente Sunset/Los Angeles                 | Los Angeles     | CA           |
| Kaiser Permanente West Los Angeles                   | Los Angeles     | CA           |
| King Drew Medical Center                             | Los Angeles     | CA           |
| Los Angeles County, University Southern California   | Los Angeles     | CA           |
| UCLA Mattel Children's Hospital at Ronald Reagan     | Los Angeles     | CA           |
| St. Francis Medical Center                           | Lynwood         | CA           |
| Providence Holy Cross Medical Center                 | Mission Hills   | CA           |
| Doctors Medical Center of Modesto                    | Modesto         | CA           |
| Memorial Medical Center                              | Modesto         | CA           |
| Garfield Medical Center                              | Monterey Park   | CA           |
| Riverside University Health System Medical Center    | Moreno Valley   | CA           |
| Paradise Valley Hospital                             | National City   | CA           |
| Hoag Memorial Presbyterian Hospital                  | Newport Beach   | CA           |
| Northridge Hospital Medical Center                   | Northridge      | CA           |
| Kaiser Permanente Oakland                            | Oakland         | CA           |
| Tri-City Health Care District                        | Oceanside       | CA           |

| <b>Hospital</b>                                             | <b>City</b>     | <b>State</b> |
|-------------------------------------------------------------|-----------------|--------------|
| University of California Irvine Medical Center              | Orange          | CA           |
| St. John's Regional Medical Center                          | Oxnard          | CA           |
| Desert Regional Medical Center                              | Palm Springs    | CA           |
| Kaiser Permanente Panorama City                             | Panorama City   | CA           |
| Huntington Memorial Hospital                                | Pasadena        | CA           |
| Pomona Valley Hospital Medical Center                       | Pomona          | CA           |
| Mercy Medical Center                                        | Redding         | CA           |
| Redlands Community Hospital                                 | Redlands        | CA           |
| Kaiser Permanente Riverside                                 | Riverside       | CA           |
| Parkview Community Hospital                                 | Riverside       | CA           |
| Riverside Community Hospital                                | Riverside       | CA           |
| Kaiser Permanente Sacramento/Roseville                      | Roseville       | CA           |
| Sutter Roseville Medical Center                             | Roseville       | CA           |
| Anderson Lucchetti Women's and Children's Center            | Sacramento      | CA           |
| Kaiser Permanente Sacramento                                | Sacramento      | CA           |
| Methodist Hospital of Sacramento                            | Sacramento      | CA           |
| UC Davis Medical Center                                     | Sacramento      | CA           |
| Natividad Medical Center                                    | Salinas         | CA           |
| Salinas Valley Memorial Healthcare System                   | Salinas         | CA           |
| Community Hospital of San Bernardino                        | San Bernardino  | CA           |
| St. Bernadine Medical Center                                | San Bernardino  | CA           |
| Kaiser Permanente San Diego                                 | San Diego       | CA           |
| Naval Medical Center San Diego                              | San Diego       | CA           |
| Scripps Mercy Hospital San Diego                            | San Diego       | CA           |
| Sharp Mary Birch Hospital for Women                         | San Diego       | CA           |
| UCSD Medical Center - Hillcrest                             | San Diego       | CA           |
| California Pacific Medical Center - West                    | San Francisco   | CA           |
| Kaiser Permanente San Francisco                             | San Francisco   | CA           |
| UCSF Benioff Children's Hospital                            | San Francisco   | CA           |
| Zuckerberg San Francisco General Hospital and Trauma Center | San Francisco   | CA           |
| San Gabriel Valley Medical Center                           | San Gabriel     | CA           |
| Good Samaritan Hospital                                     | San Jose        | CA           |
| O'Connor Hospital                                           | San Jose        | CA           |
| Regional Medical Center of San Jose                         | San Jose        | CA           |
| Santa Clara Valley Medical Center                           | San Jose        | CA           |
| Kaiser Permanente San Leandro                               | San Leandro     | CA           |
| Sierra Vista Regional Medical Center                        | San Luis Obispo | CA           |
| Orange County Global Medical Center                         | Santa Ana       | CA           |
| Santa Barbara Cottage Hospital                              | Santa Barbara   | CA           |

| <b>Hospital</b>                                  | <b>City</b>    | <b>State</b> |
|--------------------------------------------------|----------------|--------------|
| Kaiser Permanente Santa Clara                    | Santa Clara    | CA           |
| Marian Regional Medical Center                   | Santa Maria    | CA           |
| UCLA Medical Center & Orthopaedic Hospital       | Santa Monica   | CA           |
| Santa Rosa Memorial Hospital                     | Santa Rosa     | CA           |
| Sutter Santa Rosa Regional Hospital              | Santa Rosa     | CA           |
| Dameron Hospital Association                     | Stockton       | CA           |
| St. Joseph's Medical Center                      | Stockton       | CA           |
| Olive View - UCLA Medical Center                 | Sylmar         | CA           |
| Providence Tarzana Medical Center                | Tarzana        | CA           |
| Los Robles Regional Hospital and Medical Center  | Thousand Oaks  | CA           |
| Harbor - UCLA Medical Center                     | Torrance       | CA           |
| Providence Little Company of Mary Medical Center | Torrance       | CA           |
| Torrance Memorial Medical Center                 | Torrance       | CA           |
| San Antonio Regional Hospital                    | Upland         | CA           |
| Henry Mayo Newhall Memorial Hospital             | Valencia       | CA           |
| Valley Presbyterian Hospital                     | Van Nuys       | CA           |
| Community Memorial Hospital of Ventura           | Ventura        | CA           |
| Ventura County Medical Center                    | Ventura        | CA           |
| Kaweah Delta Healthcare District                 | Visalia        | CA           |
| John Muir Medical Center                         | Walnut Creek   | CA           |
| Kaiser Permanente Walnut Creek                   | Walnut Creek   | CA           |
| Watsonville Community Hospital                   | Watsonville    | CA           |
| Citrus Valley Medical Center                     | West Covina    | CA           |
| Presbyterian Intercommunity Hospital             | Whittier       | CA           |
| Kaiser Permanente Woodland Hills                 | Woodland Hills | CA           |
| University of Colorado Health Sciences Center    | Aurora         | CO           |
| Denver Health Medical Center                     | Denver         | CO           |
| Rocky Mountain Hospital for Children             | Denver         | CO           |
| Rose Medical Center                              | Denver         | CO           |
| Saint Joseph Hospital                            | Denver         | CO           |
| Swedish Medical Center                           | Englewood      | CO           |
| Poudre Valley Hospital                           | Fort Collins   | CO           |
| St. Mary's Hospital and Medical Center           | Grand Junction | CO           |
| Good Samaritan Medical Center                    | Lafayette      | CO           |
| Danbury Hospital                                 | Danbury        | CT           |
| University of Connecticut Health Center          | Farmington     | CT           |
| Greenwich Hospital                               | Greenwich      | CT           |
| Connecticut Children's Medical Center            | Hartford       | CT           |
| St. Francis Hospital                             | Hartford       | CT           |
| Hospital of Central Connecticut                  | New Britain    | CT           |

| <b>Hospital</b>                                     | <b>City</b>     | <b>State</b> |
|-----------------------------------------------------|-----------------|--------------|
| Norwalk Hospital                                    | Norwalk         | CT           |
| Stamford Hospital                                   | Stamford        | CT           |
| Christiana Care Health Services                     | Newark          | DE           |
| Washington Hospital Center                          | Washington      | DC           |
| West Boca Medical Center                            | Boca Raton      | FL           |
| Brandon Regional Hospital                           | Brandon         | FL           |
| Broward Health Salah Foundation Children's Hospital | Fort Lauderdale | FL           |
| Golisano Children's Hospital of Southwest Florida   | Fort Myers      | FL           |
| UF Health Shands Hospital                           | Gainesville     | FL           |
| Joe DiMaggio Children's Hospital                    | Hollywood       | FL           |
| UF Health Jacksonville                              | Jacksonville    | FL           |
| Northwest Medical Center                            | Margate         | FL           |
| Baptist Children's Hospital                         | Miami           | FL           |
| Jackson Memorial Hospital                           | Miami           | FL           |
| Florida Hospital for Children                       | Orlando         | FL           |
| Winnie Palmer Hospital for Women and Babies         | Orlando         | FL           |
| Sacred Heart Health System                          | Pensacola       | FL           |
| Sheridan Children's Plantation Hospital             | Plantation      | FL           |
| Morton Plant Mease                                  | Safety Harbor   | FL           |
| All Children's at Sarasota Memorial                 | Sarasota        | FL           |
| Tallahassee Memorial Hospital                       | Tallahassee     | FL           |
| St. Joseph's Children's Hospital                    | Tampa           | FL           |
| Tampa General Hospital                              | Tampa           | FL           |
| Women's Center at Florida Hospital                  | Tampa           | FL           |
| St. Mary's Hospital                                 | West Palm Beach | FL           |
| Piedmont Athens Regional                            | Athens          | GA           |
| Emory University Hospital, Midtown                  | Atlanta         | GA           |
| Northside Hospital                                  | Atlanta         | GA           |
| Piedmont Hospital                                   | Atlanta         | GA           |
| Augusta University Health System                    | Augusta         | GA           |
| Wellstar Cobb Hospital                              | Austell         | GA           |
| Medical Center at Columbus Regional                 | Columbus        | GA           |
| Piedmont Rockdale Hospital                          | Conyers         | GA           |
| Hamilton Medical Center                             | Dalton          | GA           |
| WellStar Atlanta Medical Center South               | East Point      | GA           |
| Northeast Georgia Medical Center                    | Gainesville     | GA           |
| Gwinnett Hospital System                            | Lawrenceville   | GA           |
| Coliseum Medical Center                             | Macon           | GA           |
| Wellstar Kennestone Hospital                        | Marietta        | GA           |
| Southern Regional Medical Center                    | Riverdale       | GA           |

| <b>Hospital</b>                                                         | <b>City</b>       | <b>State</b> |
|-------------------------------------------------------------------------|-------------------|--------------|
| Memorial Health Savannah                                                | Savannah          | GA           |
| Piedmont Henry Hospital                                                 | Stockbridge       | GA           |
| Kaiser Permanente Moanalua Medical Center                               | Honolulu          | HI           |
| Kapiolani Medical Center for Women & Children                           | Honolulu          | HI           |
| St. Luke's Regional Medical Center                                      | Boise             | ID           |
| Portneuf Medical Center                                                 | Pocatello         | ID           |
| St. Luke's Magic Valley                                                 | Twin Falls        | ID           |
| Northwest Community Hospital                                            | Arlington Heights | IL           |
| Rush Copley Medical Center                                              | Aurora            | IL           |
| Advocate Illinois Masonic Medical Center                                | Chicago           | IL           |
| John H. Stroger, Jr. Hospital of Cook County                            | Chicago           | IL           |
| Mercy Hospital and Medical Center                                       | Chicago           | IL           |
| Mt. Sinai Hospital Medical Center                                       | Chicago           | IL           |
| Northwestern Memorial                                                   | Chicago           | IL           |
| Rush University Medical Center                                          | Chicago           | IL           |
| St. Joseph Hospital                                                     | Chicago           | IL           |
| University of Chicago                                                   | Chicago           | IL           |
| University of Illinois at Chicago                                       | Chicago           | IL           |
| Advocate Good Samaritan Hospital                                        | Downers Grove     | IL           |
| Evanston Hospital                                                       | Evanston          | IL           |
| Adventist Hinsdale Hospital                                             | Hinsdale          | IL           |
| St. Alexius Medical Center                                              | Hoffman Estates   | IL           |
| Provena Saint Joseph Medical Center                                     | Joliet            | IL           |
| Ronald McDonald Children's Hospital at Loyola University Medical Center | Maywood           | IL           |
| Edward Hospital and Health Services                                     | Naperville        | IL           |
| Advocate Children's Hospital                                            | Oak Lawn          | IL           |
| Advocate Children's Hospital                                            | Park Ridge        | IL           |
| OSF Children's Hospital of Illinois                                     | Peoria            | IL           |
| Rockford Memorial Hospital                                              | Rockford          | IL           |
| St. John's Hospital                                                     | Springfield       | IL           |
| Carle Foundation Hospital                                               | Urbana            | IL           |
| Central DuPage Hospital                                                 | Winfield          | IL           |
| Indiana University Health North Hospital                                | Carmel            | IN           |
| St. Vincent Evansville                                                  | Evansville        | IN           |
| Dupont Hospital                                                         | Fort Wayne        | IN           |
| Lutheran Hospital of Indiana                                            | Fort Wayne        | IN           |
| Parkview Women's and Children's Hospital                                | Fort Wayne        | IN           |
| St. Joseph Hospital                                                     | Fort Wayne        | IN           |
| Methodist Hospitals Northlake Campus                                    | Gary              | IN           |



| <b>Hospital</b>                         | <b>City</b>     | <b>State</b> |
|-----------------------------------------|-----------------|--------------|
| Community Hospital North Indianapolis   | Indianapolis    | IN           |
| St. Vincent Women's Hospital            | Indianapolis    | IN           |
| Franciscan Health Lafayette             | Lafayette       | IN           |
| Ball Memorial Hospital                  | Muncie          | IN           |
| Women's Hospital                        | Newburgh        | IN           |
| Memorial Hospital                       | South Bend      | IN           |
| Mercy Medical Center                    | Cedar Rapids    | IA           |
| St. Luke's Hospital Cedar Rapids        | Cedar Rapids    | IA           |
| Genesis Medical Center                  | Davenport       | IA           |
| Blank Children's Hospital               | Des Moines      | IA           |
| St. Luke's Regional Medical Center      | Sioux City      | IA           |
| Covenant Medical Center                 | Waterloo        | IA           |
| University of Kansas Hospital Authority | Kansas City     | KS           |
| Overland Park Regional Medical Center   | Overland Park   | KS           |
| Shawnee Mission Medical Center          | Shawnee Mission | KS           |
| Via Christi Hospitals                   | Wichita         | KS           |
| Wesley Medical Center                   | Wichita         | KS           |
| King's Daughters Medical Center         | Ashland         | KY           |
| The Medical Center                      | Bowling Green   | KY           |
| Methodist Hospital                      | Henderson       | KY           |
| Jennie Stuart Medical Center            | Hopkinsville    | KY           |
| Baptist Health Lexington                | Lexington       | KY           |
| Kentucky Children's Hospital            | Lexington       | KY           |
| Norton Children's Hospital              | Louisville      | KY           |
| Norton Women's and Children's Hospital  | Louisville      | KY           |
| University of Louisville Hospital       | Louisville      | KY           |
| Baptist Health Madisonville             | Madisonville    | KY           |
| Owensboro Health Regional Hospital      | Owensboro       | KY           |
| Baptist Health Paducah                  | Paducah         | KY           |
| Christus St. Frances Cabrini Hospital   | Alexandria      | LA           |
| Rapides Women's and Children's Hospital | Alexandria      | LA           |
| Earl K. Long Medical Center             | Baton Rouge     | LA           |
| Ochsner Medical Center Baton Rouge      | Baton Rouge     | LA           |
| Woman's Hospital                        | Baton Rouge     | LA           |
| Ochsner Medical Center West Bank        | Gretna          | LA           |
| North Oaks Medical Center               | Hammond         | LA           |
| Terrebonne General Medical Center       | Houma           | LA           |
| Lafayette General Medical Center        | Lafayette       | LA           |
| Women's and Children's Hospital         | Lafayette       | LA           |
| Christus Lake Area Hospital             | Lake Charles    | LA           |

| <b>Hospital</b>                                  | <b>City</b>    | <b>State</b> |
|--------------------------------------------------|----------------|--------------|
| West Jefferson Medical Center                    | Marrero        | LA           |
| East Jefferson General Hospital                  | Metairie       | LA           |
| Tulane Lakeside Hospital for Women and Children  | Metairie       | LA           |
| Medical Center of Louisiana at New Orleans       | New Orleans    | LA           |
| Ochsner Medical Center                           | New Orleans    | LA           |
| Touro Infirmary                                  | New Orleans    | LA           |
| CHRISTUS Highland Medical Center                 | Shreveport     | LA           |
| LSU Health Sciences Center                       | Shreveport     | LA           |
| Willis Knighton South                            | Shreveport     | LA           |
| Eastern Maine Medical Center                     | Bangor         | ME           |
| Barbara Bush Children's at Maine Medical         | Portland       | ME           |
| Anne Arundel Medical Center                      | Annapolis      | MD           |
| Franklin Square Hospital Center                  | Baltimore      | MD           |
| Greater Baltimore Medical Center                 | Baltimore      | MD           |
| Johns Hopkins Bayview Medical Center             | Baltimore      | MD           |
| Johns Hopkins Hospital                           | Baltimore      | MD           |
| Mercy Medical Center                             | Baltimore      | MD           |
| Sinai Hospital of Baltimore                      | Baltimore      | MD           |
| St. Agnes Hospital                               | Baltimore      | MD           |
| University of Maryland Medical Center            | Baltimore      | MD           |
| Walter Reed National Military Medical Center     | Bethesda       | MD           |
| Prince George's Hospital Center                  | Cheverly       | MD           |
| Howard County General Hospital                   | Columbia       | MD           |
| Frederick Memorial Hospital                      | Frederick      | MD           |
| Shady Grove Adventist Hospital                   | Rockville      | MD           |
| Peninsula Regional Medical Center                | Salisbury      | MD           |
| Holy Cross Hospital                              | Silver Spring  | MD           |
| University of Maryland St. Joseph Medical Center | Towson         | MD           |
| Beth Israel Deaconess Medical Center             | Boston         | MA           |
| Boston Medical Center                            | Boston         | MA           |
| Brigham and Women's Hospital                     | Boston         | MA           |
| Massachusetts General Hospital for Children      | Boston         | MA           |
| Steward St. Elizabeth's Medical Center           | Brighton       | MA           |
| South Shore Hospital                             | South Weymouth | MA           |
| Baystate Medical Center                          | Springfield    | MA           |
| UMass Memorial Healthcare                        | Worcester      | MA           |
| St. Joseph Mercy Hospital                        | Ann Arbor      | MI           |
| Beaumont Hospital                                | Dearborn       | MI           |
| Henry Ford Hospital                              | Detroit        | MI           |
| St. John Detroit Riverview Hospital              | Detroit        | MI           |

| <b>Hospital</b>                                                     | <b>City</b>    | <b>State</b> |
|---------------------------------------------------------------------|----------------|--------------|
| St. John Hospital and Medical Center                                | Detroit        | MI           |
| Hurley Medical Center                                               | Flint          | MI           |
| DeVos Children's, Spectrum Health                                   | Grand Rapids   | MI           |
| Mercy Health Saint Mary's                                           | Grand Rapids   | MI           |
| Children's Hospital at Bronson                                      | Kalamazoo      | MI           |
| Sparrow Hospital                                                    | Lansing        | MI           |
| UP Health System Marquette                                          | Marquette      | MI           |
| St. Joseph Mercy Oakland                                            | Pontiac        | MI           |
| William Beaumont Hospital                                           | Royal Oak      | MI           |
| Covenant Healthcare                                                 | Saginaw        | MI           |
| Providence Hospital and Medical Center                              | Southfield     | MI           |
| Munson Medical Center                                               | Traverse City  | MI           |
| Essentia Health St. Mary's Children's Hospital                      | Duluth         | MN           |
| Children's Minnesota Minneapolis Hospital                           | Minneapolis    | MN           |
| Hennepin County Medical Center                                      | Minneapolis    | MN           |
| University of Minnesota Masonic Children's Hospital                 | Minneapolis    | MN           |
| North Memorial Medical Center                                       | Robbinsdale    | MN           |
| Mayo Foundation                                                     | Rochester      | MN           |
| St. Cloud Hospital                                                  | Saint Cloud    | MN           |
| Children's Minnesota Saint Paul Hospital                            | Saint Paul     | MN           |
| Merit Health River Oaks                                             | Flowood        | MS           |
| Merit Health Woman's Hospital                                       | Flowood        | MS           |
| Memorial Hospital at Gulfport                                       | Gulfport       | MS           |
| Forrest General Hospital                                            | Hattiesburg    | MS           |
| Merit Health Wesley                                                 | Hattiesburg    | MS           |
| Batson Children's Hospital at University Mississippi Medical Center | Jackson        | MS           |
| Merit Health Central                                                | Jackson        | MS           |
| Mississippi Baptist Health Systems                                  | Jackson        | MS           |
| St. Dominic-Jackson Memorial Hospital                               | Jackson        | MS           |
| Anderson Regional Medical Center                                    | Meridian       | MS           |
| Rush Foundation Hospital                                            | Meridian       | MS           |
| North Mississippi Medical Center                                    | Tupelo         | MS           |
| SoutheastHEALTH                                                     | Cape Girardeau | MO           |
| St. Francis Medical Center                                          | Cape Girardeau | MO           |
| Women's & Children's Hospital, University of Missouri               | Columbia       | MO           |
| Centerpoint Medical Center                                          | Independence   | MO           |
| Freeman Hospital and Health System                                  | Joplin         | MO           |
| Research Medical Center                                             | Kansas City    | MO           |
| St. Luke's Hospital                                                 | Kansas City    | MO           |

| <b>Hospital</b>                                                        | <b>City</b>   | <b>State</b> |
|------------------------------------------------------------------------|---------------|--------------|
| Truman Medical Center                                                  | Kansas City   | MO           |
| Mercy Children's Hospital St. Louis                                    | Saint Louis   | MO           |
| SSM Health Cardinal Glennon Children's Hospital                        | Saint Louis   | MO           |
| St. Louis Children's Hospital                                          | Saint Louis   | MO           |
| Cox Health Neonatology                                                 | Springfield   | MO           |
| Mercy Children's Hospital Springfield                                  | Springfield   | MO           |
| St. Vincent Hospital & Health Center                                   | Billings      | MT           |
| Benefis Healthcare                                                     | Great Falls   | MT           |
| Community Medical Center                                               | Missoula      | MT           |
| Good Samaritan Hospital Kearney                                        | Kearney       | NE           |
| Bryan Medical Center                                                   | Lincoln       | NE           |
| CHI Health St. Elizabeth                                               | Lincoln       | NE           |
| CHI Health Bergan Mercy Medical Center                                 | Omaha         | NE           |
| Children's Hospital and Medical Center                                 | Omaha         | NE           |
| Creighton University Medical Center                                    | Omaha         | NE           |
| Methodist Women's Hospital                                             | Omaha         | NE           |
| Nebraska Medical Center                                                | Omaha         | NE           |
| St. Rose Dominican Hospital - Siena Campus                             | Henderson     | NV           |
| Children's Hospital of Nevada at UMC                                   | Las Vegas     | NV           |
| Sunrise Hospital and Medical Center                                    | Las Vegas     | NV           |
| Dartmouth Hitchcock Medical Center                                     | Lebanon       | NH           |
| Elliot Hospital                                                        | Manchester    | NH           |
| Children's Regional Hospital at Cooper                                 | Camden        | NJ           |
| Our Lady of Lourdes Medical Center                                     | Camden        | NJ           |
| CentraState Medical Center                                             | Freehold      | NJ           |
| Hackensack University Medical Center                                   | Hackensack    | NJ           |
| Robert Wood Johnson University Hospital Hamilton                       | Hamilton      | NJ           |
| Jersey City Medical Center                                             | Jersey City   | NJ           |
| Monmouth Medical Center Southern Campus                                | Lakewood      | NJ           |
| Saint Barnabas Medical Center                                          | Livingston    | NJ           |
| Monmouth Medical Center                                                | Long Branch   | NJ           |
| Mountainside Hospital                                                  | Montclair     | NJ           |
| Goryeb Children's Hospital                                             | Morristown    | NJ           |
| Jersey Shore University Medical Center                                 | Neptune       | NJ           |
| Robert Wood Johnson University Hospital                                | New Brunswick | NJ           |
| St. Peter's Medical Center                                             | New Brunswick | NJ           |
| Children's Hospital of New Jersey at Newark Beth Israel Medical Center | Newark        | NJ           |
| University Hospital                                                    | Newark        | NJ           |
| St. Joseph Hospital and Medical Center                                 | Paterson      | NJ           |

| <b>Hospital</b>                                    | <b>City</b>   | <b>State</b> |
|----------------------------------------------------|---------------|--------------|
| Capital Health Medical Center - Hopewell           | Pennington    | NJ           |
| Atlanticare Regional Medical Center                | Pomona        | NJ           |
| Community Medical Center                           | Toms River    | NJ           |
| Virtua Hospital Systems                            | Voorhees      | NJ           |
| Children's Medical Center at Presbyterian Hospital | Albuquerque   | NM           |
| Lovelace Women's Hospital                          | Albuquerque   | NM           |
| Albany Medical Center                              | Albany        | NY           |
| St. Peter's Hospital                               | Albany        | NY           |
| Montefiore Medical Center - Wakefield Campus       | Bronx         | NY           |
| Weiler Hospital Montefiore                         | Bronx         | NY           |
| Brookdale Hospital Medical Center                  | Brooklyn      | NY           |
| Brooklyn Hospital Center                           | Brooklyn      | NY           |
| Kings County Hospital Center                       | Brooklyn      | NY           |
| Maimonides Medical Center                          | Brooklyn      | NY           |
| University Hospital of Brooklyn                    | Brooklyn      | NY           |
| Woodhull Medical Center                            | Brooklyn      | NY           |
| Arnot Ogden Medical Center                         | Elmira        | NY           |
| North Shore University Hospital                    | Manhasset     | NY           |
| NYU Winthrop                                       | Mineola       | NY           |
| Cohen Children's Medical Center of New York        | New Hyde Park | NY           |
| Bellevue Hospital                                  | New York      | NY           |
| Columbia University Medical Center                 | New York      | NY           |
| Lenox Hill Hospital                                | New York      | NY           |
| Mt. Sinai Kravis Children's Hospital               | New York      | NY           |
| St. Vincent Hospital and Medical Center            | New York      | NY           |
| Tisch Hospital, NYU Medical Center                 | New York      | NY           |
| Weill Cornell Medical Center                       | New York      | NY           |
| Vassar Brothers Hospital                           | Poughkeepsie  | NY           |
| Golisano Children's Hospital at Strong             | Rochester     | NY           |
| Richmond University Medical Center                 | Staten Island | NY           |
| Staten Island University Hospital                  | Staten Island | NY           |
| Stony Brook University Medical Center              | Stony Brook   | NY           |
| St. Joseph's Health Center                         | Syracuse      | NY           |
| Good Samaritan Hospital Medical Center             | West Islip    | NY           |
| Mission Children's Hospital                        | Asheville     | NC           |
| Carolinas Medical Center                           | Charlotte     | NC           |
| Novant Health Presbyterian Medical Center          | Charlotte     | NC           |
| Jeff Gordon Children's Hospital                    | Concord       | NC           |
| Cape Fear Valley Medical Center                    | Fayetteville  | NC           |
| CaroMont Regional Medical Center                   | Gastonia      | NC           |

| <b>Hospital</b>                                | <b>City</b>      | <b>State</b> |
|------------------------------------------------|------------------|--------------|
| Cone Health Women's Hospital                   | Greensboro       | NC           |
| Vidant Medical Center                          | Greenville       | NC           |
| Catawba Valley Medical Center                  | Hickory          | NC           |
| Frye Regional Medical Center                   | Hickory          | NC           |
| Onslow Memorial Hospital                       | Jacksonville     | NC           |
| FirstHealth Moore Regional Hospital            | Pinehurst        | NC           |
| Rex Hospital                                   | Raleigh          | NC           |
| WakeMed Health                                 | Raleigh          | NC           |
| Betty H. Cameron Women's & Children's Hospital | Wilmington       | NC           |
| Brenner Children's Hospital                    | Winston-Salem    | NC           |
| Forsyth Memorial Hospital                      | Winston-Salem    | NC           |
| Sanford Medical Center Bismarck                | Bismarck         | ND           |
| Essentia Health                                | Fargo            | ND           |
| Sanford Medical Center Fargo                   | Fargo            | ND           |
| Altru Health System                            | Grand Forks      | ND           |
| Trinity Hospital                               | Minot            | ND           |
| Summa Akron City Hospital                      | Akron            | OH           |
| St. Elizabeth Boardman Hospital                | Boardman         | OH           |
| Aultman Hospital                               | Canton           | OH           |
| Mercy Medical Center                           | Canton           | OH           |
| Children's Hospital Medical Center             | Cincinnati       | OH           |
| Fairview Hospital                              | Cleveland        | OH           |
| MetroHealth Medical Center                     | Cleveland        | OH           |
| Mt. Carmel Health Systems                      | Columbus         | OH           |
| Nationwide Children's Hospital                 | Columbus         | OH           |
| Doctor's Hospital West                         | Columbus         | OH           |
| Grant Medical Center                           | Columbus         | OH           |
| Riverside Methodist Hospital                   | Columbus         | OH           |
| Ohio State Medical Center                      | Columbus         | OH           |
| Miami Valley Hospital                          | Dayton           | OH           |
| Southview Medical Center                       | Dayton           | OH           |
| Dublin Methodist Hospital                      | Dublin           | OH           |
| Kettering Medical Center                       | Kettering        | OH           |
| St. Rita's Medical Center                      | Lima             | OH           |
| Hillcrest Hospital                             | Mayfield Heights | OH           |
| Mercy Children's Hospital                      | Toledo           | OH           |
| Toledo Children's Hospital                     | Toledo           | OH           |
| Mount Carmel St. Ann's Hospital                | Westerville      | OH           |
| Northside Regional Medical Center              | Youngstown       | OH           |
| Mercy Health Center                            | Oklahoma City    | OK           |

| <b>Hospital</b>                                    | <b>City</b>   | <b>State</b> |
|----------------------------------------------------|---------------|--------------|
| University of Oklahoma Health Sciences Center      | Oklahoma City | OK           |
| The Children's Hospital at Saint Francis           | Tulsa         | OK           |
| Oklahoma State University Medical Center           | Tulsa         | OK           |
| Peggy V. Helmerich Women's Center                  | Tulsa         | OK           |
| St. John Medical Center                            | Tulsa         | OK           |
| St. Charles Health Care                            | Bend          | OR           |
| Rogue Regional Medical Center                      | Medford       | OR           |
| Oregon Health and Science University               | Portland      | OR           |
| Providence St. Vincent Medical Center              | Portland      | OR           |
| Randall Children's Hospital at Legacy Emanuel      | Portland      | OR           |
| Salem Hospital                                     | Salem         | OR           |
| Sacred Heart Medical Center                        | Springfield   | OR           |
| Abington Memorial Hospital                         | Abington      | PA           |
| Lehigh Valley Health Network                       | Allentown     | PA           |
| St. Luke's Allentown Campus                        | Allentown     | PA           |
| St. Luke's University Hospital                     | Bethlehem     | PA           |
| Bryn Mawr Hospital                                 | Bryn Mawr     | PA           |
| Geisinger Medical Center                           | Danville      | PA           |
| Doylestown Hospital                                | Doylestown    | PA           |
| Penn Highlands DuBois                              | DuBois        | PA           |
| Ephrata Community Hospital                         | Ephrata       | PA           |
| Hamot Medical Center                               | Erie          | PA           |
| St. Vincent Health Center                          | Erie          | PA           |
| Penn State Children's Hospital                     | Hershey       | PA           |
| Conemaugh Memorial Medical Center                  | Johnstown     | PA           |
| Lancaster General Health - Women & Babies Hospital | Lancaster     | PA           |
| St. Mary Medical Center                            | Langhorne     | PA           |
| Holy Redeemer Hospital and Medical Center          | Meadowbrook   | PA           |
| Riddle Hospital                                    | Media         | PA           |
| Einstein Medical Center                            | Philadelphia  | PA           |
| Hahnemann University Hospital                      | Philadelphia  | PA           |
| Hospital of the University of Pennsylvania         | Philadelphia  | PA           |
| Pennsylvania Hospital                              | Philadelphia  | PA           |
| Temple University Hospital                         | Philadelphia  | PA           |
| Thomas Jefferson University Hospital               | Philadelphia  | PA           |
| Allegheny General Hospital                         | Pittsburgh    | PA           |
| Magee-Womens Hospital of UPMC                      | Pittsburgh    | PA           |
| Western Pennsylvania Hospital                      | Pittsburgh    | PA           |
| Reading Hospital - Tower Health                    | Reading       | PA           |
| Moses Taylor Hospital                              | Scranton      | PA           |

| <b>Hospital</b>                                  | <b>City</b>    | <b>State</b> |
|--------------------------------------------------|----------------|--------------|
| Crozer Chester Medical Center                    | Upland         | PA           |
| Chester County Hospital                          | West Chester   | PA           |
| Lankenau Medical Center                          | Wynnewood      | PA           |
| WellSpan York Hospital                           | York           | PA           |
| Medical University of South Carolina             | Charleston     | SC           |
| Trident Medical Center                           | Charleston     | SC           |
| Palmetto Health Baptist                          | Columbia       | SC           |
| Palmetto Health Richland                         | Columbia       | SC           |
| McLeod Regional Medical Center                   | Florence       | SC           |
| Children's Hospital of Greenville                | Greenville     | SC           |
| Spartanburg Regional Healthcare System           | Spartanburg    | SC           |
| Summerville Medical Center                       | Summerville    | SC           |
| Rapid City Regional Hospital                     | Rapid City     | SD           |
| Avera McKennan Hospital                          | Sioux Falls    | SD           |
| Sanford Health                                   | Sioux Falls    | SD           |
| Children's Hospital at Erlanger                  | Chattanooga    | TN           |
| Parkridge East Hospital                          | Chattanooga    | TN           |
| Maury Regional Medical Center                    | Columbia       | TN           |
| Jackson Madison County General Hospital          | Jackson        | TN           |
| Niswonger Children's Hospital                    | Johnson City   | TN           |
| Wellmont Holston Valley Medical Center           | Kingsport      | TN           |
| St. Mary's Hospital                              | Knoxville      | TN           |
| University of Tennessee Medical Center           | Knoxville      | TN           |
| Baptist Memorial Hospital for Women              | Memphis        | TN           |
| Regional One Health                              | Memphis        | TN           |
| St. Francis Hospital Memphis                     | Memphis        | TN           |
| Children's Hospital at TriStar Centennial        | Nashville      | TN           |
| Monroe Carell Jr. Children's Hospital Vanderbilt | Nashville      | TN           |
| Baptist St. Anthony's Health System              | Amarillo       | TX           |
| Texas Tech University Health Science Center      | Amarillo       | TX           |
| Medical Center of Arlington                      | Arlington      | TX           |
| Texas Health Arlington Memorial Hospital         | Arlington      | TX           |
| North Austin Medical Center                      | Austin         | TX           |
| St. David's Medical Center                       | Austin         | TX           |
| Valley Regional Medical Center                   | Brownsville    | TX           |
| Christus Spohn Hospital Corpus Christi South     | Corpus Christi | TX           |
| Corpus Christi Medical Center                    | Corpus Christi | TX           |
| Baylor Healthcare System                         | Dallas         | TX           |
| Medical City Dallas                              | Dallas         | TX           |
| Methodist Dallas Medical Center                  | Dallas         | TX           |



| <b>Hospital</b>                                       | <b>City</b>     | <b>State</b> |
|-------------------------------------------------------|-----------------|--------------|
| Presbyterian Hospital of Dallas                       | Dallas          | TX           |
| Women's Hospital At Renaissance                       | Edinburg        | TX           |
| Las Palmas Medical Center                             | El Paso         | TX           |
| University Medical Center of El Paso                  | El Paso         | TX           |
| Baylor All Saints Medical Center                      | Fort Worth      | TX           |
| Cook Children's Medical Center                        | Fort Worth      | TX           |
| Harris Methodist Fort Worth Hospital                  | Fort Worth      | TX           |
| John Peter Smith Hospital                             | Fort Worth      | TX           |
| University of Texas Medical Branch                    | Galveston       | TX           |
| Ben Taub General Hospital                             | Houston         | TX           |
| Memorial Hermann Memorial City Medical Center         | Houston         | TX           |
| Memorial Hermann Southeast                            | Houston         | TX           |
| Methodist Willowbrook Hospital                        | Houston         | TX           |
| Texas Children's Hospital, Baylor College of Medicine | Houston         | TX           |
| Woman's Hospital of Texas                             | Houston         | TX           |
| Kingwood Medical Center                               | Kingwood        | TX           |
| Medical City Lewisville                               | Lewisville      | TX           |
| Christus Good Shepherd Medical Center                 | Longview        | TX           |
| Covenant Women and Children's Hospital                | Lubbock         | TX           |
| Medical Center Hospital                               | Odessa          | TX           |
| Medical City Plano                                    | Plano           | TX           |
| Texas Health Presbyterian Hospital Plano              | Plano           | TX           |
| Children's Hospital of San Antonio                    | San Antonio     | TX           |
| Methodist Children's Hospital                         | San Antonio     | TX           |
| Metropolitan Methodist Hospital                       | San Antonio     | TX           |
| North Central Baptist Hospital                        | San Antonio     | TX           |
| St. Luke's Baptist Hospital                           | San Antonio     | TX           |
| University Hospital San Antonio                       | San Antonio     | TX           |
| McLane Children's Hospital                            | Temple          | TX           |
| Memorial Hermann The Woodlands                        | The Woodlands   | TX           |
| St. Luke's The Woodlands Hospital                     | The Woodlands   | TX           |
| Christus Trinity Mother Frances Health System         | Tyler           | TX           |
| Clear Lake Regional Medical Center                    | Webster         | TX           |
| Intermountain Medical Center                          | Murray          | UT           |
| McKay Dee Hospital Center                             | Ogden           | UT           |
| Utah Valley Regional Medical Center                   | Provo           | UT           |
| Dixie Regional Medical Center                         | Saint George    | UT           |
| University of Vermont Children's Hospital             | Burlington      | VT           |
| University of Virginia                                | Charlottesville | VA           |
| Inova Fair Oaks Hospital                              | Fairfax         | VA           |

| <b>Hospital</b>                                              | <b>City</b>    | <b>State</b> |
|--------------------------------------------------------------|----------------|--------------|
| Inova Children's Hospital                                    | Falls Church   | VA           |
| Mary Washington Hospital                                     | Fredericksburg | VA           |
| Centra Virginia Baptist Hospital                             | Lynchburg      | VA           |
| Children's Hospital of the King's Daughters                  | Norfolk        | VA           |
| Naval Medical Center                                         | Portsmouth     | VA           |
| Bon Secours St. Mary's Hospital                              | Richmond       | VA           |
| Children's Hospital of Richmond at VCU                       | Richmond       | VA           |
| CJW Medical Center - Chippenham Campus                       | Richmond       | VA           |
| Henrico Doctors' Hospital                                    | Richmond       | VA           |
| Johnston-Willis Hospital                                     | Richmond       | VA           |
| Carilion Clinic Children's Hospital                          | Roanoke        | VA           |
| Winchester Medical Center                                    | Winchester     | VA           |
| Overlake Hospital Medical Center                             | Bellevue       | WA           |
| Providence Regional Medical Center Everett                   | Everett        | WA           |
| Evergreen Health                                             | Kirkland       | WA           |
| UW Medicine Valley Medical Center                            | Renton         | WA           |
| Kadlec Regional Medical Center                               | Richland       | WA           |
| Swedish Medical Center                                       | Seattle        | WA           |
| University of Washington Medical Center                      | Seattle        | WA           |
| Deaconess Hospital                                           | Spokane        | WA           |
| Providence Sacred Heart Medical Center & Children's Hospital | Spokane        | WA           |
| Legacy Salmon Creek Hospital                                 | Vancouver      | WA           |
| PeaceHealth Southwest Medical Center                         | Vancouver      | WA           |
| Yakima Valley Memorial Hospital                              | Yakima         | WA           |
| Charleston Area Medical Center                               | Charleston     | WV           |
| Cabell Huntington Hospital                                   | Huntington     | WV           |
| West Virginia University School of Medicine                  | Morgantown     | WV           |
| St. Elizabeth Hospital                                       | Appleton       | WI           |
| Aurora Baycare Medical Center                                | Green Bay      | WI           |
| St. Vincent Hospital                                         | Green Bay      | WI           |
| Gundersen Lutheran Medical Center                            | La Crosse      | WI           |
| Meriter Hospital                                             | Madison        | WI           |
| SSM Health St. Mary's Hospital Medical Center                | Madison        | WI           |
| St. Joseph Hospital / Marshfield Clinic                      | Marshfield     | WI           |
| Ascension St. Joseph's Hospital                              | Milwaukee      | WI           |
| Aurora Sinai Medical Center                                  | Milwaukee      | WI           |
| Children's Hospital of Wisconsin                             | Milwaukee      | WI           |
| Columbia St. Mary's Hospital                                 | Milwaukee      | WI           |
| Children's Hospital of Wisconsin, Fox Valley                 | Neenah         | WI           |

| <b>Hospital</b>               | <b>City</b> | <b>State</b> |
|-------------------------------|-------------|--------------|
| Ascension All Saints Hospital | Racine      | WI           |
| Waukesha Memorial Hospital    | Waukesha    | WI           |
| Aspirus Wausau Hospital       | Wausau      | WI           |
| Aurora Women's Pavilion       | West Allis  | WI           |
